# Supplementary material
Source: PubMed Central journal article supplement (PMC4010260)
Supplement: bi401724r_si_001.pdf [file bi401724r_si_001.pdf]

Supplemental Data:

| Table 1. Primer Sequences |                                                                                                                                       |
|---------------------------|---------------------------------------------------------------------------------------------------------------------------------------|
| Name                      | Truncation Primer Sequences                                                                                                           |
| ΔC-tail                   | GCA TGC CCG GGC CTA GCA AGG CAG GTG CTG GGC AAT GGC C                                                                                 |
| Δ385                      | CAT GCG GCC GCC TAG TGG GTA GAG CGG TAG CTG AGG G                                                                                     |
| Δ396                      | GCA TGC GGC CGC CTA GTC TGA GGA CTG GCT GCT CAA TGT GGA                                                                               |
| Δ420                      | GCA TGC GGC CGC CTA TGT GTC TGT CCA GCC CAC TTC ACT CTC                                                                               |
|                           | Cassette Mutagenesis Primer Sequences                                                                                                 |
| Mel BlpI                  | GCT TCT CGG TGT ATC AGG CCA GCT CAG CCA CCC CTC CCT CAG C                                                                             |
| Mel BlpI R                | GCT GAG GGA GGG GTG GCT GAG CTG GCC TGA TAC ACC GAG AAG C                                                                             |
| Mel XhoI                  | GCT GGA TCT CTG GAC GGA AGC CTC GAG AGT CCC TGG GTT CTG AGA GTG AAG TGG                                                               |
| Mel XhoI rev              | CCA CTT CAC TCT CAG AAC CCA GGG ACT CTC GAG GCT TCC GTC CAG AGA TCC AGC                                                               |
| M2 Like Insert            | GCT CAG CCA CCC CTC CCT CGC CTA CCG CTC TAC CCA CCG CGC CAC ATT GAG CAGCCA GGC<br>CTC AGA CCT CAG CTG GAT CTC TGG ACG GAA GCC TCG AG  |
| All6                      | GCT CAG CCA CCC CTC CCT AGC CTA CCG CTC TAC CCA CCG CGC CGC CTT GGC CGC CCA GGC<br>CGC CGA CCT CAG CTG GAT CTC TGG ACG GAA GCC TCG AG |
| Fill In forward           | ATG CGC TCA GCC ACC CCT CCC TC                                                                                                        |
| Fill in Rev               | ATG CCT CGA GGC TTC CGT CC                                                                                                            |
|                           | Single Site-directed Mutagenesis Primer Sequences                                                                                     |
| MusMelSer388toAlaF        | CCG CTC TAC CCA CCG CGC CAC ATT GAG CAG CC                                                                                            |
| MusMelSer388toAlaR        | GGC TGC TCA ATG TGG CGC GGT GGG TAG AGC GG                                                                                            |
| MusMelThr389toAlaF        | CCG CTC TAC CCA CCG CTC CGC ATT GAG CAG CCA GTC C                                                                                     |
| MusMelThr389toAlaR        | GGA CTG GCT GCT CAA TGC GGA GCG GTG GGT AGA GCG G                                                                                     |
| MusMelSer391toGlyF        | CCC ACC GCT CCA CAT TGG GCA GCC AGT CCT CAG ACC                                                                                       |
| MusMelSer391toGlyR        | GGT CTG AGG ACT GGC TGC CCA ATG TGG AGC GGT GGG                                                                                       |
| MusMelSer392toGlyF        | CCG CTC CAC ATT GAG CGG CCA GTC CTC AGA CC                                                                                            |
| MusMelSer392toGlyR        | GGT CTG AGG ACT GGC CGC TCA ATG TGG AGC GG                                                                                            |
| MusMelSer394toAlaF        | CCA CAT TGA GCA GCC AGG CCT CAG ACC TCA GCT GG                                                                                        |
| MusMelSer394toAlaR        | CCA GCT GAG GTC TGA GGC CTG GCT GCT CAA TGT GG                                                                                        |
| MusMelSer395toAlaF        | CCA CAT TGA GCA GCC AGT CCG CAG ACC TCA GCT GGA TCT CTG G                                                                             |
| MusMelSer395toAlaR        | CCA GAG ATC CAG CTG AGG TCT GCG GAC TGG CTG CTC AAT GTG G                                                                             |
|                           | Double Site-directed Mutagenesis Primer Sequences                                                                                     |
| 381 394 F                 | CCT CCC TCG GCT ACC GCT CTA CCC ACC GCT CCA CAT TGA GCA GCC AGG CCT CAG ACC TC                                                        |
| 381 394 R                 | GAG GTC TGA GGC CTG GCT GCT CAA TGT GGA GCG GTG GGT AGA GCG GTA GCC GAG GGA GG                                                        |
| 388 389 F                 | CGC TCT ACC CAC CGC GCC GCA TTG AGC AGC CAG TCC TCA GAC C                                                                             |
| 388 389 R                 | GGT CTG AGG ACT GGC TGC TCA ATG CGG CGC GGT GGG TAG AGC G                                                                             |
| 391 392 F                 | CGC TCT ACC CAC CGC TCC ACA TTG GGC GGC CAG TCC TCA GAC CTC AGC                                                                       |
| 391 392 R                 | GCT GAG GTC TGA GGA CTG GCC GCC CAA TGT GGA GCG GTG GGT AGA GCG                                                                       |
| 394 395 F                 | CCC ACC GCT CCA CAT TGA GCA GCC AGG CCG CAG ACC TCA GCT GGA TCT CTG GAC GG                                                            |
| 394 395 R                 | CCG TCC AGA GAT CCA GCT GAG GTC TGC GGC CTG GCT GCT CAA TGT GGA GCG GTG GG                                                            |

**Table 1.** Sequences of primers used to create carboxy tail truncations, insert cassettes, and for site directed mutagenesis.

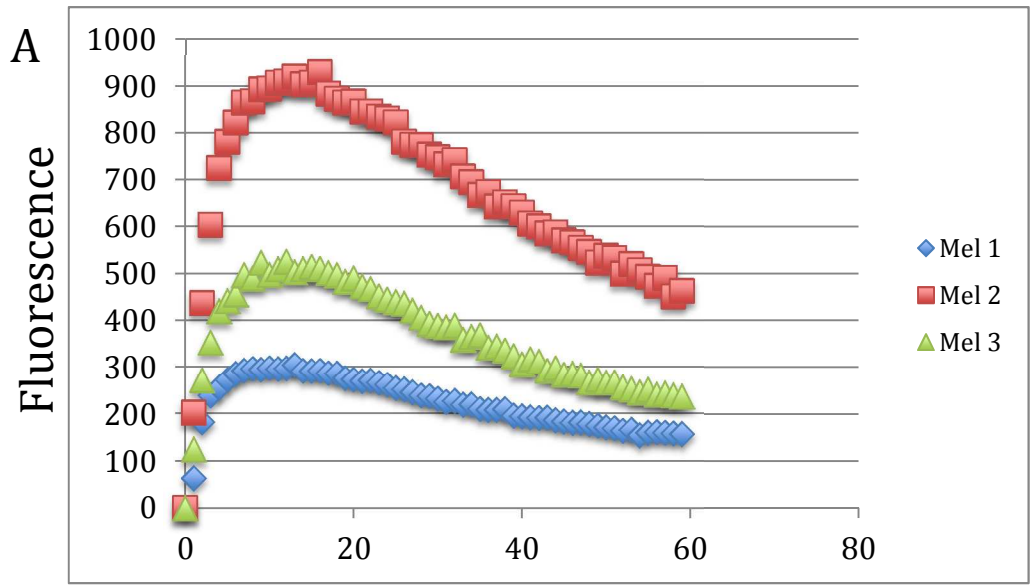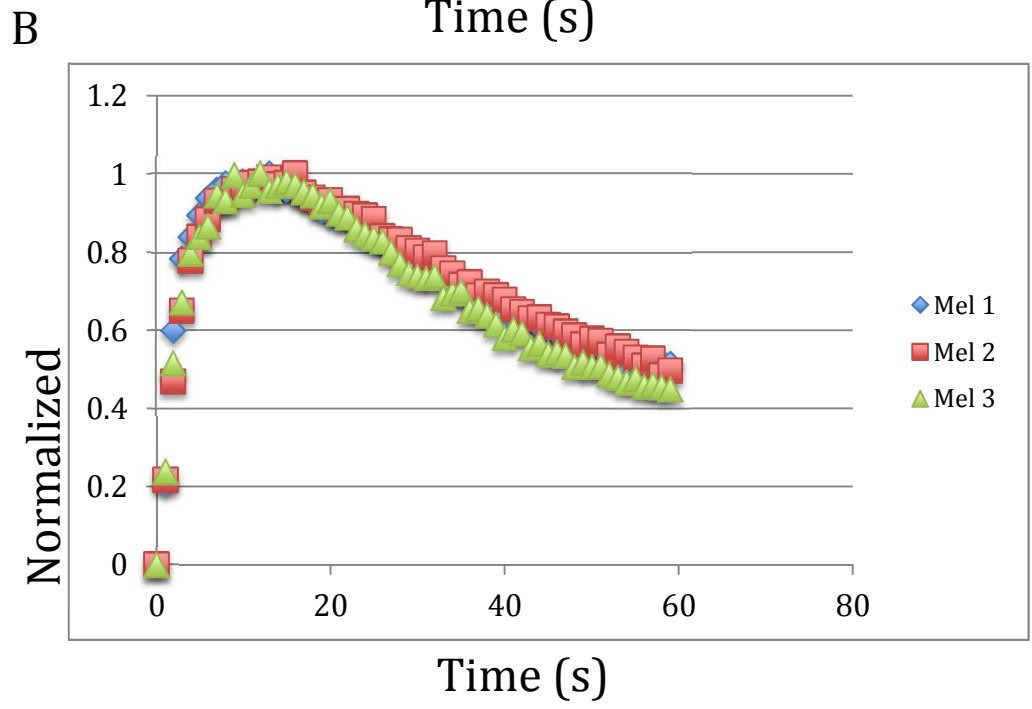

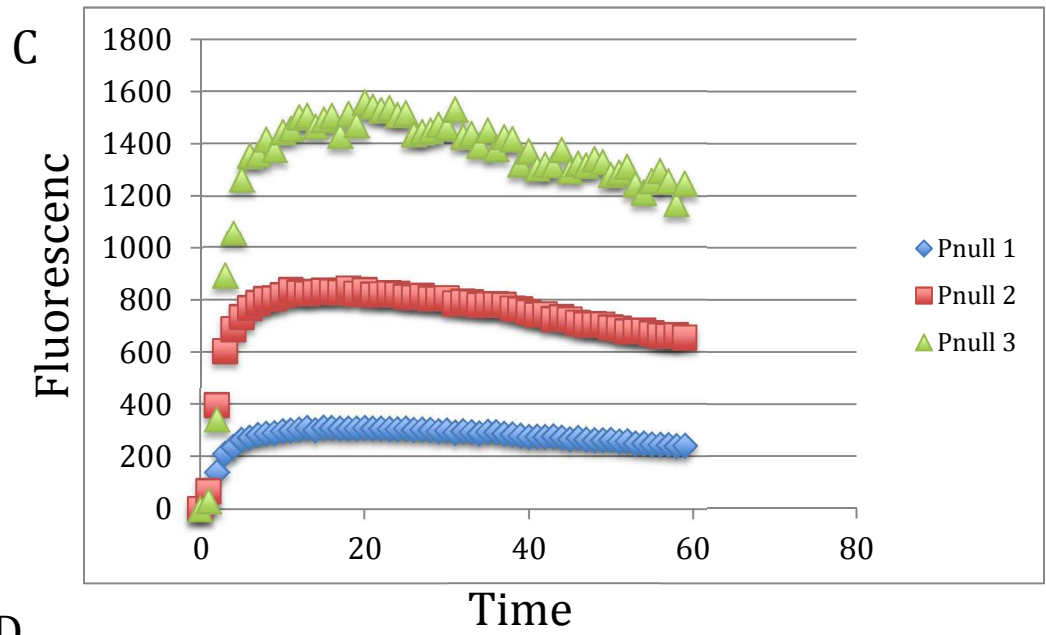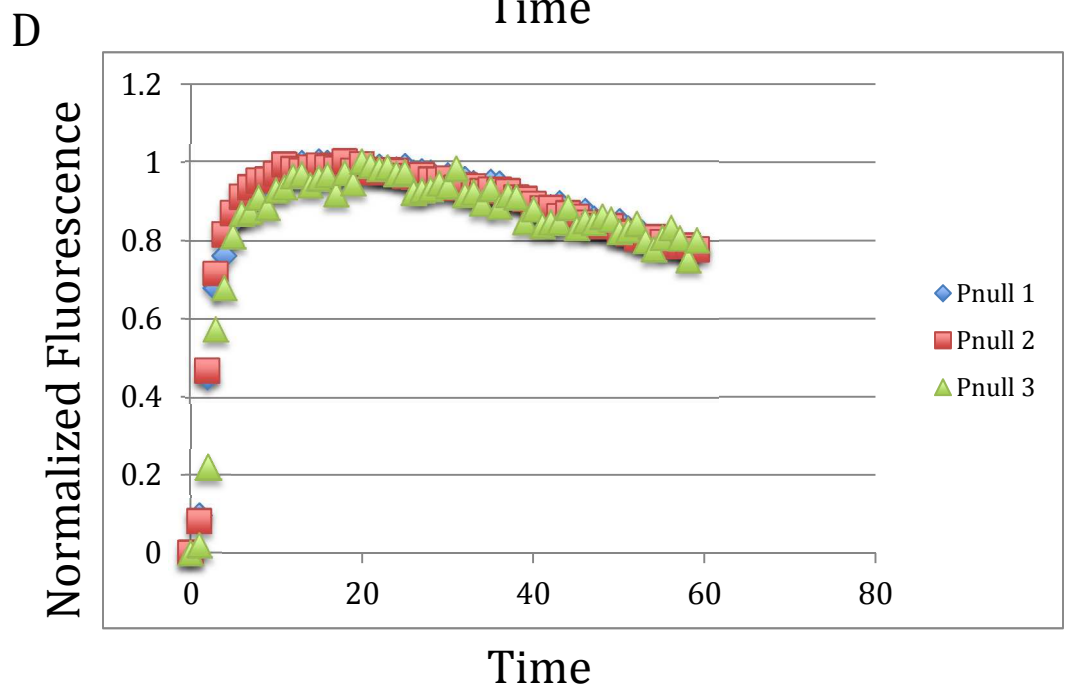

**Supplemental Figure 1. Calcium imaging of Wild type melanopsin and the Phosphonull melanopsin mutant as a function of amount of protein expressed.** Varied amounts of plasmid DNA was used to transfect and assay wild type mouse melanopsin (A and B) and the melanopsin mouse mutant lacking all phosphorylatable amino acids in the carboxy tail (phosphonull) ((C and D). In A and C the actual measured fluorescence is plotted as a function of time in B and D the data has been normalized. The deactivation kinetics in the normalized data is identical and not a function of melanopsin expression.
